# Supplementary material for: Thioglycerol-capped Mn-doped ZnS quantum dotbioconjugates as efficient two-photon fluorescent nano-probes for bioimaging
Source: Royal Society of Chemistry journal article supplement (doi:10.1039/c2tb00247g), 2012-11-15
Supplement: c2tb00247g.pdf [file c2tb00247g.pdf]

## ELECTRONIC SUPPLEMENTARY INFORMATION

# Thioglycerol-capped Mn-doped ZnS quantum dots bioconjugates as efficient two-photon fluorescent nano-probes for bioimaging

Malgorzata Geszke-Moritz,<sup>a,b</sup> Hanna Piotrowska,<sup>c</sup> Marek Murias,<sup>c</sup> Lavinia Balan,<sup>d</sup> Michal Moritz,<sup>b</sup> Janina Lulek<sup>b</sup> and Raphaël Schneider<sup>\*a</sup>

<sup>a</sup> Université de Lorraine and CNRS, Laboratoire Réactions et Génie des Procédés (UPR 3349), 1 rue Grandville, BP 20451, 54001 Nancy, France. E-mail: raphael.schneider@univ-lorraine.fr

<sup>b</sup> Department of Pharmaceutical Technology, Poznan University of Medical Sciences, Grunwaldzka 6, 60-780 Poznan, Poland.

<sup>c</sup> Department of Toxicology, Poznan University of Medical Sciences, Dojazd 30 Street, 60-780 Poznan, Poland.

<sup>d</sup> Institut de Science des Matériaux de Mulhouse LRC 7228, 15 rue Jean Starcky, 68093 Mulhouse, France.

E-mail: raphael.schneider@univ-lorraine.fr

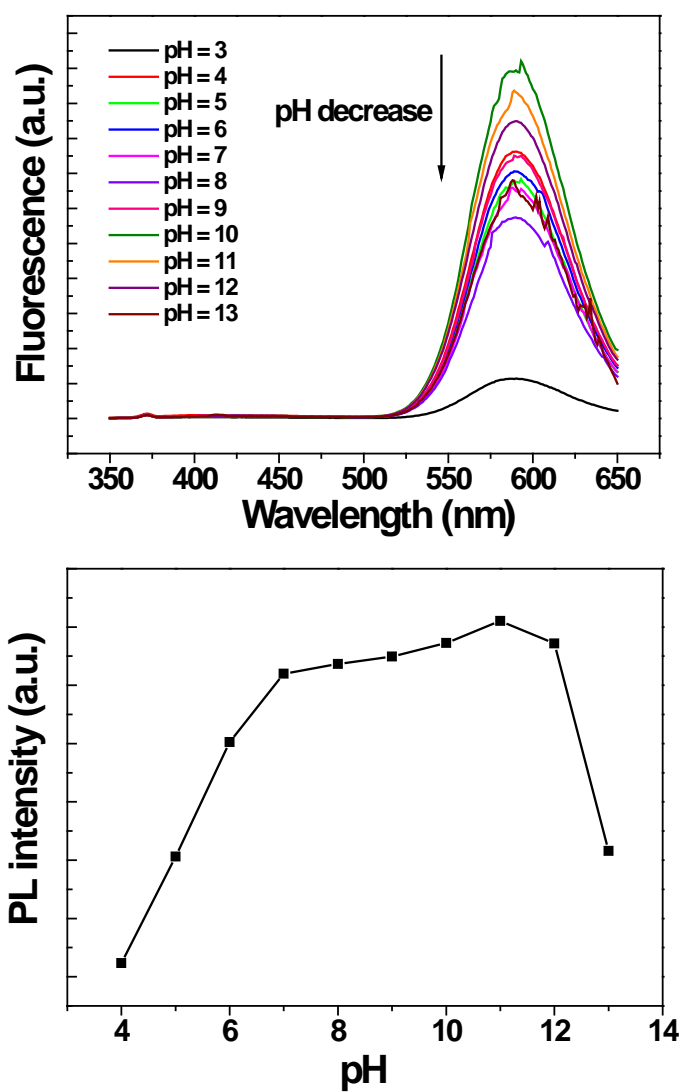

Fig. S1. Influence of pH on the PL intensity of Mn:ZnS@TG d-dots.

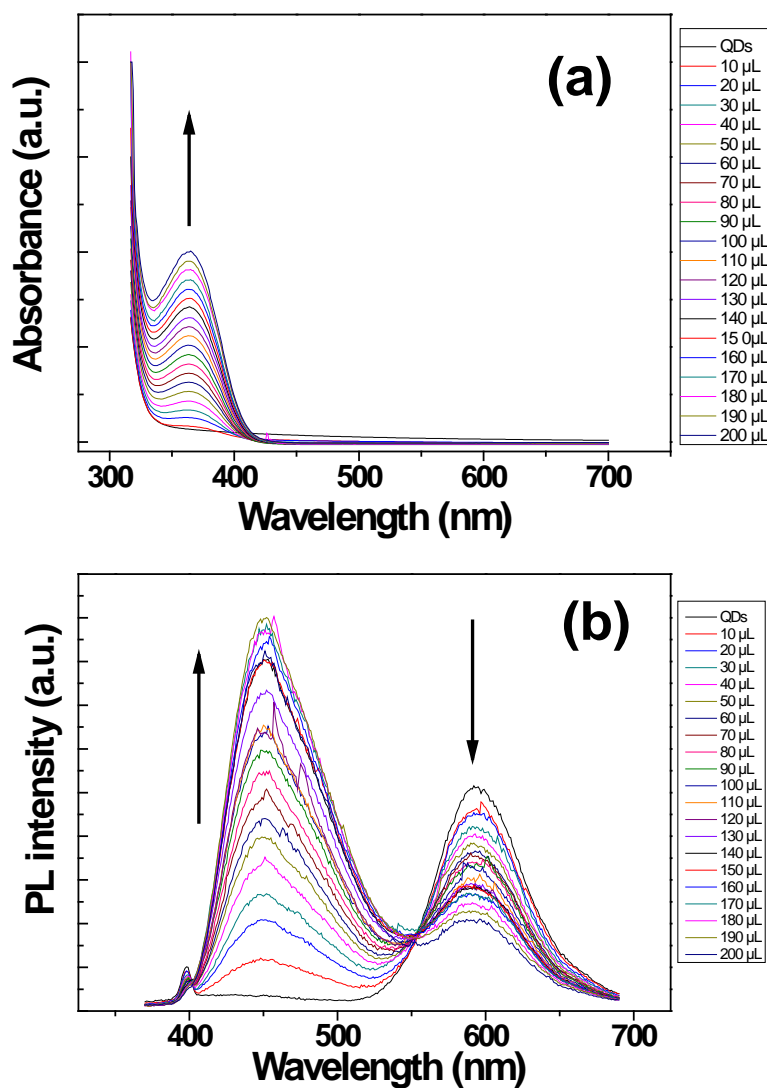

**Fig. S2.** (a) Evolution of photoluminescence spectra of Mn:ZnS@TG dots (1.25 mg in 5 mL borate buffer) upon stepwise addition (with an increment of 10  $\mu\text{L}$ ) of a 2.26 mM folic acid solution in sodium borate buffer. A decrease of PL QY from 13.0 (starting Mn:ZnS@TG dots) to 3.1 % (200  $\mu\text{L}$  of the folic acid solution added) was observed after the addition of the folic acid solution.

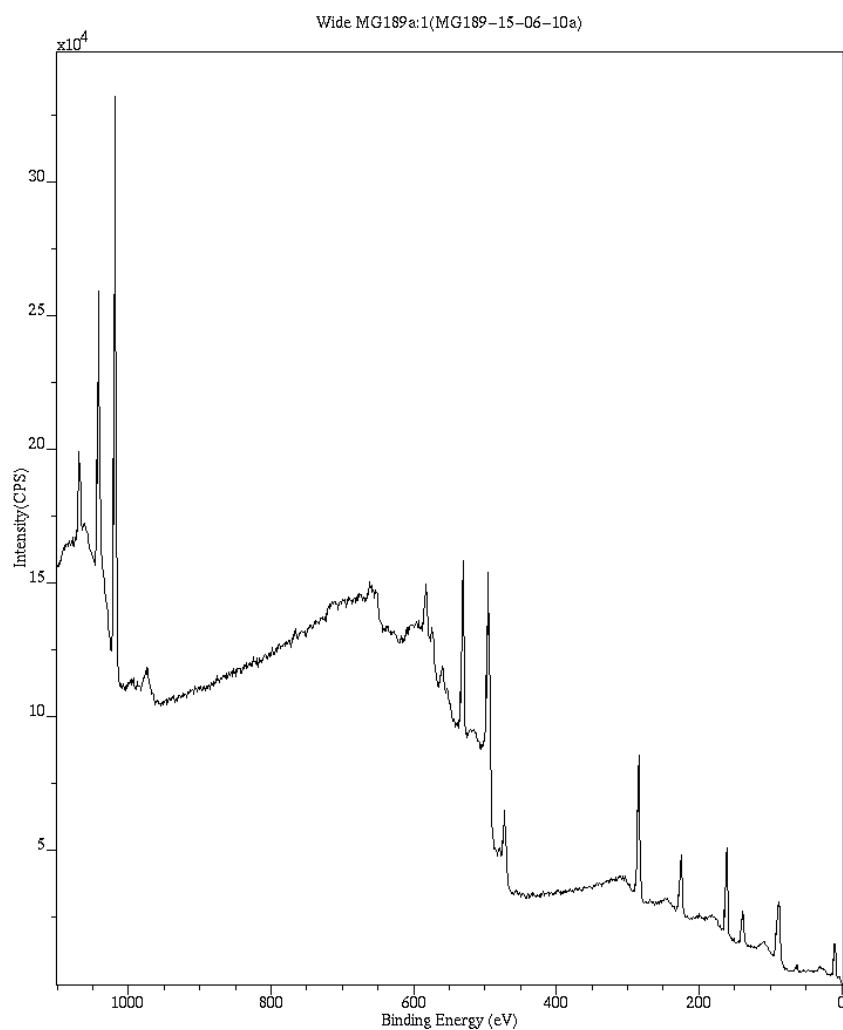

| <i>Peak</i>         | <i>Position<br/>BE (eV)</i> | <i>FWHM<br/>(eV)</i> | <i>Raw Area<br/>(CPS)</i> | <i>RSF</i>   | <i>Atomic<br/>Mass</i> | <i>Atomic<br/>Conc %</i> | <i>Mass<br/>Conc %</i> |
|---------------------|-----------------------------|----------------------|---------------------------|--------------|------------------------|--------------------------|------------------------|
| <i>Na 1s MG189a</i> | <i>1069.600</i>             | <i>1.496</i>         | <i>4858.3</i>             | <i>1.685</i> | <i>22.990</i>          | <i>4.21</i>              | <i>4.22</i>            |
| <i>Zn 2p MG189a</i> | <i>1019.500</i>             | <i>1.361</i>         | <i>31075.8</i>            | <i>3.726</i> | <i>65.387</i>          | <i>12.75</i>             | <i>36.33</i>           |
| <i>O 1s MG189a</i>  | <i>531.800</i>              | <i>2.083</i>         | <i>8017.8</i>             | <i>0.780</i> | <i>15.999</i>          | <i>18.23</i>             | <i>12.71</i>           |
| <i>C 1s MG189a</i>  | <i>284.650</i>              | <i>1.876</i>         | <i>7797.0</i>             | <i>0.278</i> | <i>12.011</i>          | <i>50.14</i>             | <i>26.24</i>           |
| <i>S 2p MG189a</i>  | <i>162.000</i>              | <i>2.396</i>         | <i>5164.1</i>             | <i>0.668</i> | <i>32.065</i>          | <i>14.67</i>             | <i>20.50</i>           |

**Fig. S3.** XPS survey spectrum of Mn:ZnS@TG dots.

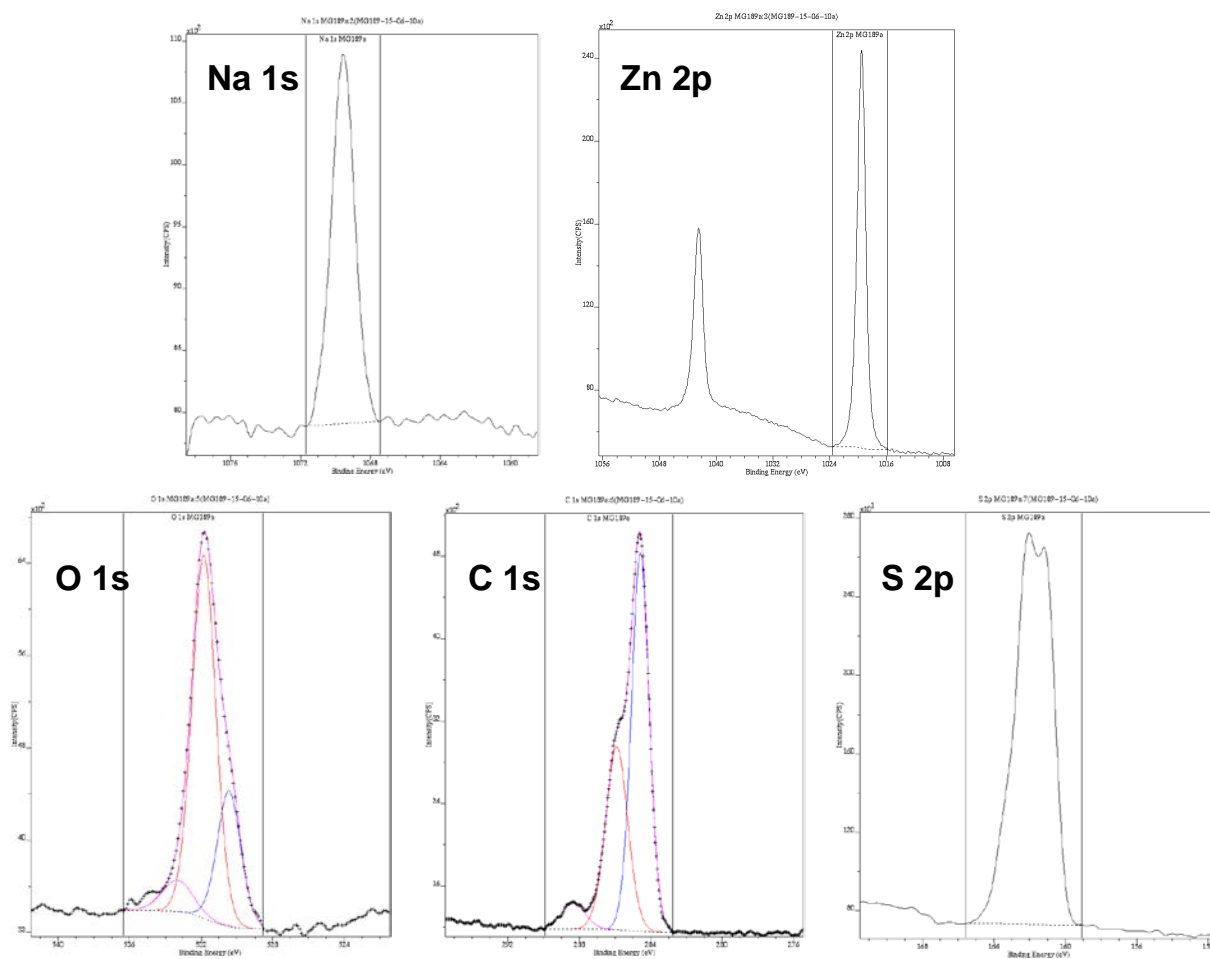

**Fig. S4.** High-resolution XPS spectra of Mn:ZnS@TG dots.

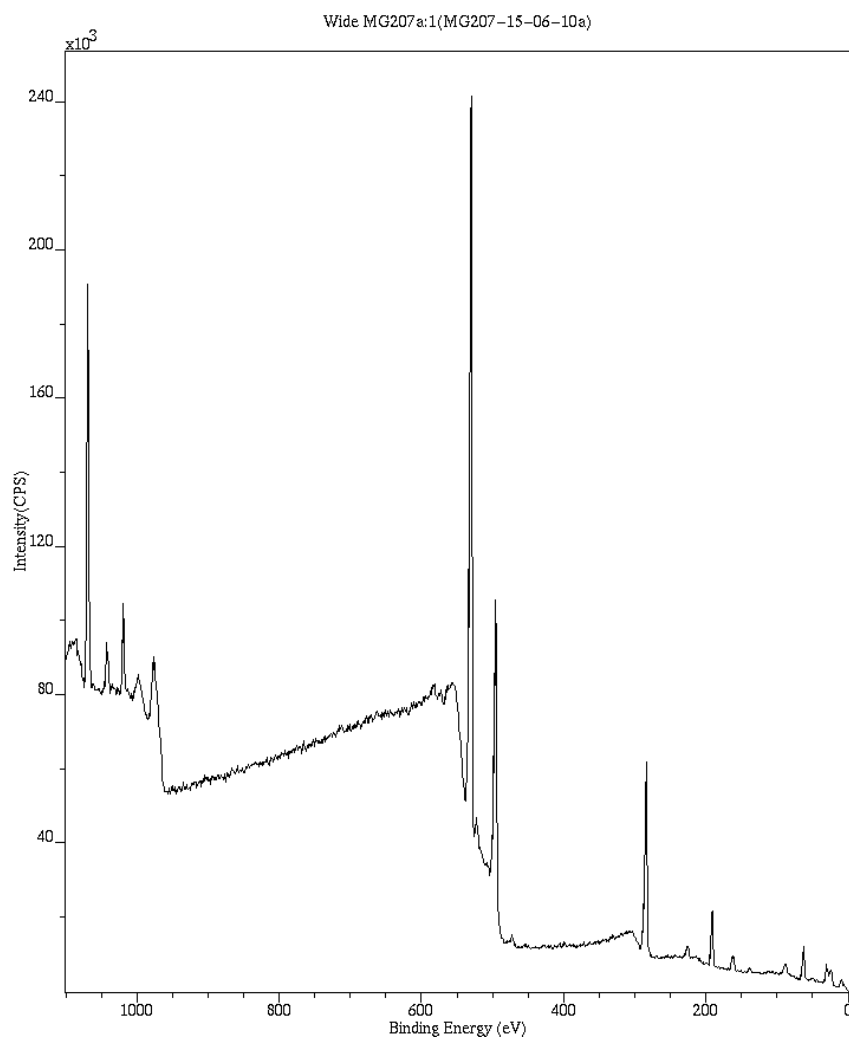

| <i>Peak</i>         | <i>Position<br/>BE (eV)</i> | <i>FWHM<br/>(eV)</i> | <i>Raw Area<br/>(CPS)</i> | <i>RSF</i>   | <i>Atomic<br/>Mass</i> | <i>Atomic<br/>Conc %</i> | <i>Mass<br/>Conc %</i> |
|---------------------|-----------------------------|----------------------|---------------------------|--------------|------------------------|--------------------------|------------------------|
| <i>Na 1s MG207a</i> | <i>1069.550</i>             | <i>1.580</i>         | <i>17774.5</i>            | <i>1.685</i> | <i>22.990</i>          | <i>9.00</i>              | <i>13.58</i>           |
| <i>Zn 2p MG207a</i> | <i>1019.450</i>             | <i>1.346</i>         | <i>3779.7</i>             | <i>3.726</i> | <i>65.387</i>          | <i>0.91</i>              | <i>3.89</i>            |
| <i>O 1s MG207a</i>  | <i>531.050</i>              | <i>1.931</i>         | <i>31395.2</i>            | <i>0.780</i> | <i>15.999</i>          | <i>41.71</i>             | <i>43.80</i>           |
| <i>N 1s MG207a</i>  | <i>399.150</i>              | <i>1.591</i>         | <i>145.4</i>              | <i>0.477</i> | <i>14.007</i>          | <i>0.32</i>              | <i>0.29</i>            |
| <i>C 1s MG207a</i>  | <i>284.650</i>              | <i>1.227</i>         | <i>8256.6</i>             | <i>0.278</i> | <i>12.011</i>          | <i>31.03</i>             | <i>24.46</i>           |
| <i>B 1s MG207a</i>  | <i>192.050</i>              | <i>1.390</i>         | <i>2295.1</i>             | <i>0.159</i> | <i>10.823</i>          | <i>15.68</i>             | <i>11.14</i>           |
| <i>S 2p MG207a</i>  | <i>161.150</i>              | <i>2.879</i>         | <i>811.0</i>              | <i>0.668</i> | <i>32.065</i>          | <i>1.35</i>              | <i>2.84</i>            |

Fig. S5. XPS survey spectrum of Mn:ZnS@TG-FA dots.

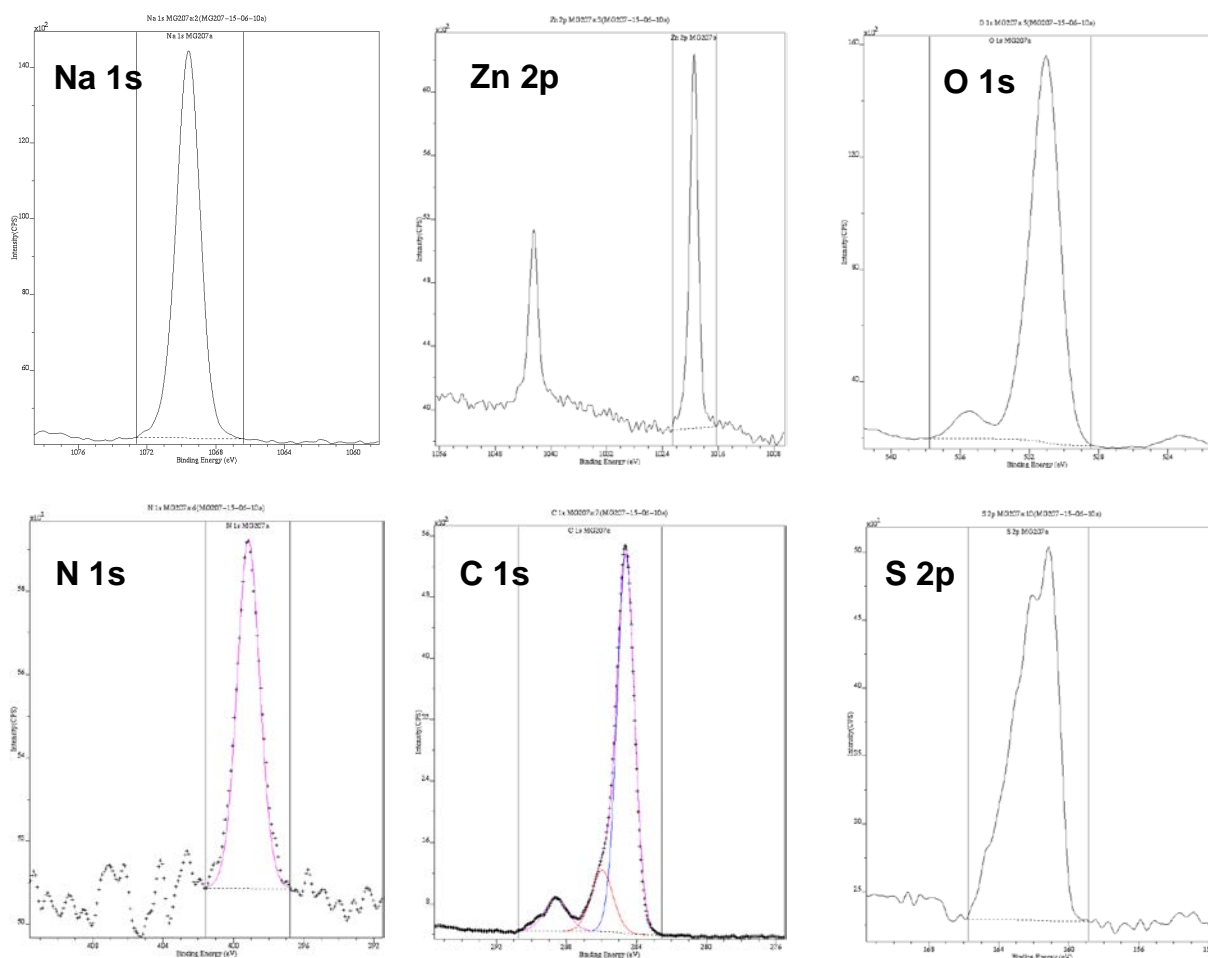

**Fig. S6.** High-resolution XPS spectra of Mn:ZnS@TG-FA dots.

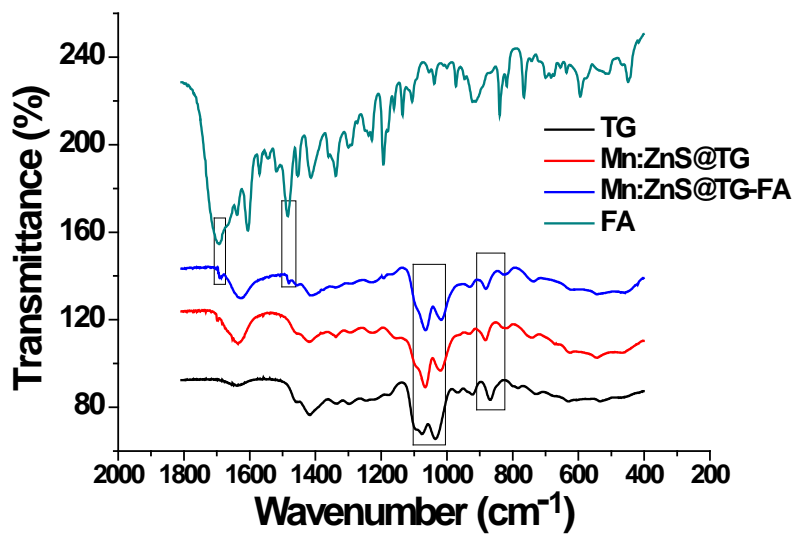

**Fig. S7.** FT-IR spectra of thioglycerol (TG), of Mn:ZnS@TG and Mn:ZnS@TG-FA d-dots, and of folic acid (FA).



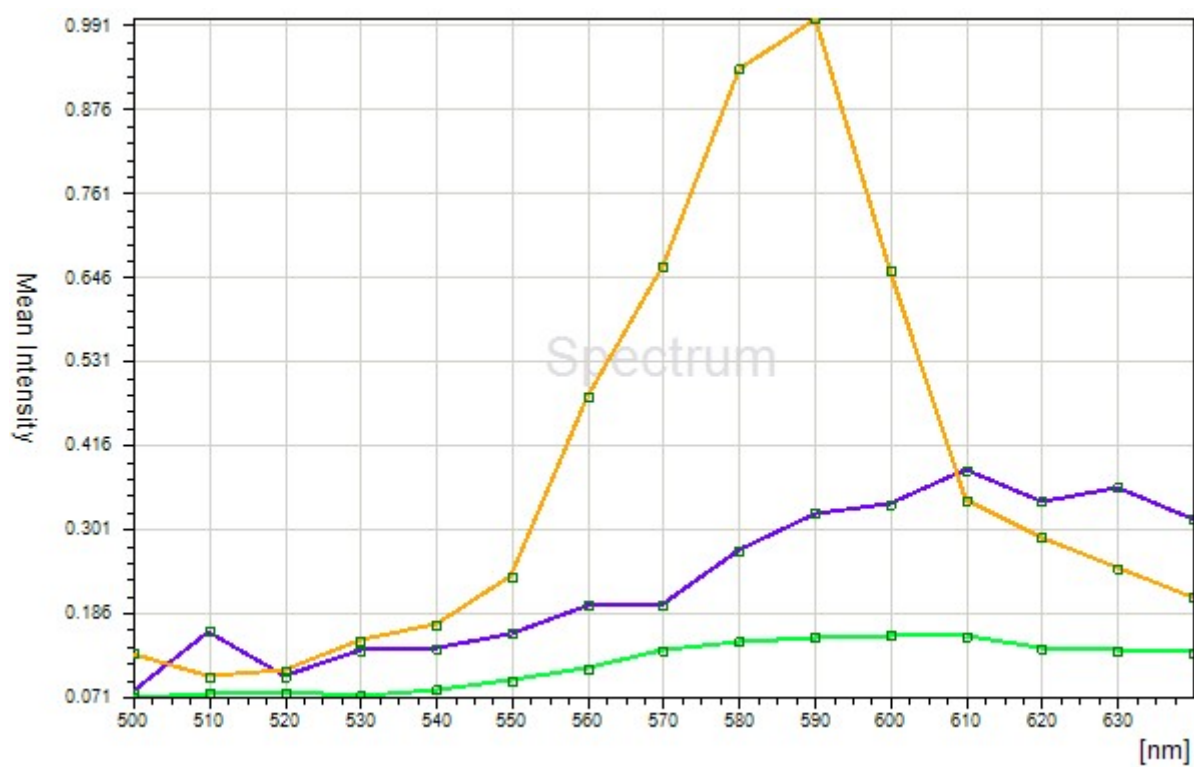

**Fig. S8.** Fluorescence emission spectra of Mn:ZnS@TG d-dots after biphotonic excitation at 720 nm (the sample was scanned from 500 to 640 nm).

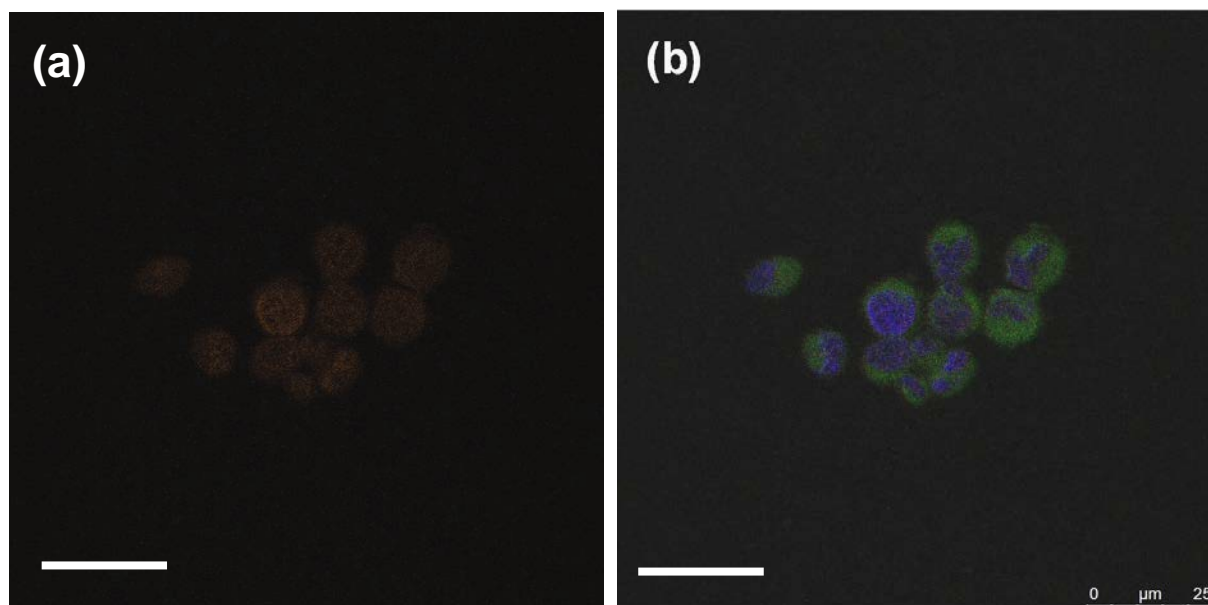

**Fig. S9.** Confocal fluorescence imaging of human T47D cells labelled with (a) Mn:ZnS@TG dots, and (b) Hoechst and JC1 organic dyes. Scale bar = 25  $\mu\text{m}$ .

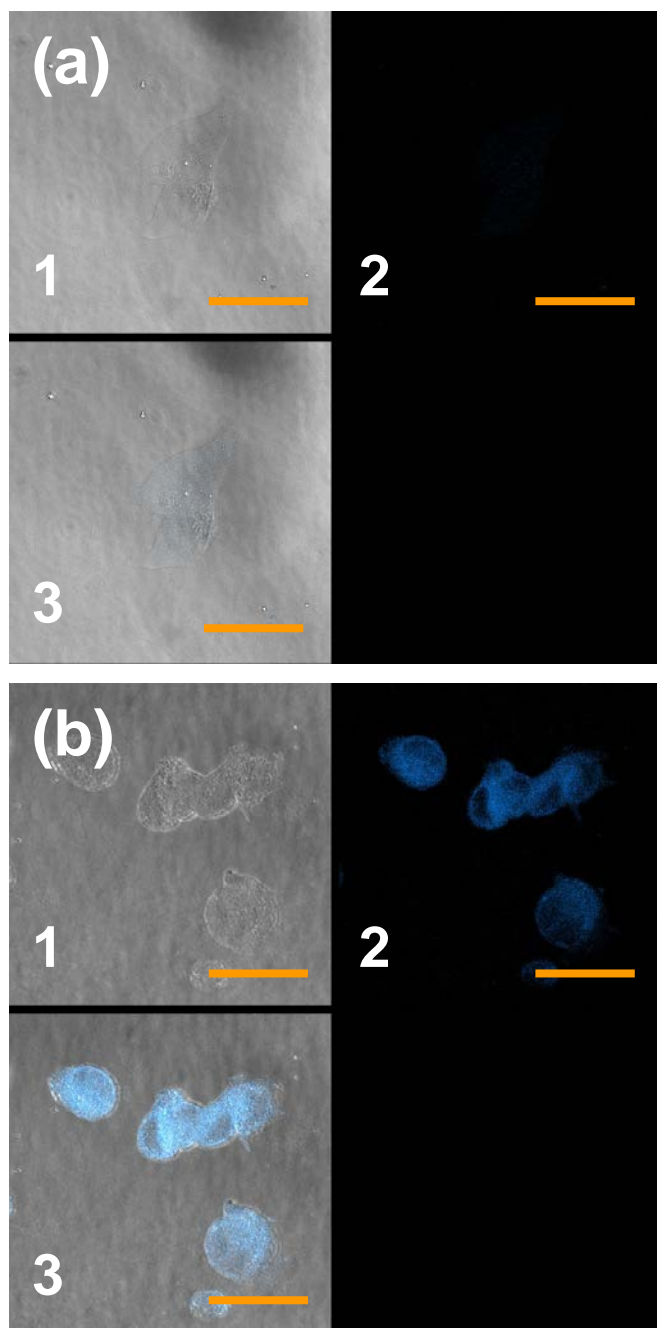

**Fig. S10.** Confocal microscopic images of T47D cells treated with Mn:ZnS@TG-FA dots. Cells in (a) were saturated with free FA for 2 h before treatment with the dots, while cells in (b) were not saturated with free FA. Images “1” are the transmission images, “2” are the corresponding fluorescence images, and “3” the overlays of fluorescence and transmission images. Two-photon confocal microscopy images were obtained with laser excitation at 800 nm. All fluorescence images are presented in false color. Scale bar = 10  $\mu\text{m}$ .
